# Supplementary material for: Identifying Local and Centralized Mental Health Services—The Development of a New Categorizing Variable
Source: Int J Environ Res Public Health. 2018 May 31;15(6):1131. doi: 10.3390/ijerph15061131 (PMC6025394; doi:10.3390/ijerph15061131)

Supplementary Table 2. The new coding variable classification process on European Service Mapping Schedule-Revised (ESMS-R) mapping tree.

| N= 89 Main<br>type of care<br>(MTC)                                                                                                                           | 1= Local,<br>without<br>gatekeeping | 2= Local with<br>gatekeeping | 3= Centralized,<br>without<br>gatekeeping | 4= Centralized,<br>with gatekeeping | Individual classification (n/6)<br>round 1. Agreement with<br>proposal | Consensus<br>(round 1.) | Consensus and final decisions after individual<br>classification (round 2.), 4 MTC (on red) re-classification<br>and Category 4 re-coding to 3 (Centralized) |
|---------------------------------------------------------------------------------------------------------------------------------------------------------------|-------------------------------------|------------------------------|-------------------------------------------|-------------------------------------|------------------------------------------------------------------------|-------------------------|--------------------------------------------------------------------------------------------------------------------------------------------------------------|
| <b>Information (I) (N=9)</b>                                                                                                                                  |                                     |                              |                                           |                                     |                                                                        |                         |                                                                                                                                                              |
| I1.1                                                                                                                                                          | 6                                   |                              |                                           |                                     | 6/6                                                                    | 1                       | 1                                                                                                                                                            |
| I1.2                                                                                                                                                          |                                     | 6                            |                                           |                                     | 6/6                                                                    | 2                       | 2                                                                                                                                                            |
| I1.3                                                                                                                                                          | 6                                   |                              |                                           |                                     | 6/6                                                                    | 1                       | 1                                                                                                                                                            |
| I1.4                                                                                                                                                          |                                     | 6                            |                                           |                                     | 6/6                                                                    | 2                       | 2                                                                                                                                                            |
| I1.5                                                                                                                                                          | 6                                   |                              |                                           |                                     | 6/6                                                                    | 1                       | 1                                                                                                                                                            |
| I2.1                                                                                                                                                          | 6                                   |                              |                                           |                                     | 6/6                                                                    | 1                       | 1                                                                                                                                                            |
| I2.1.1                                                                                                                                                        | 6                                   |                              |                                           |                                     | 6/6                                                                    | 1                       | 1                                                                                                                                                            |
| I2.1.2                                                                                                                                                        | 6                                   |                              |                                           |                                     | 6/6                                                                    | 1                       | 1                                                                                                                                                            |
| I2.2                                                                                                                                                          | 6                                   |                              |                                           |                                     | 6/6                                                                    | 1                       | 1                                                                                                                                                            |
| <b>Accessibility to care (A) (N=5)</b>                                                                                                                        |                                     |                              |                                           |                                     |                                                                        |                         |                                                                                                                                                              |
| A1                                                                                                                                                            | 6                                   |                              |                                           |                                     | 6/6                                                                    | 1                       | 1                                                                                                                                                            |
| A2                                                                                                                                                            |                                     | 6                            |                                           |                                     | 6/6                                                                    | 2                       | 2                                                                                                                                                            |
| A3                                                                                                                                                            |                                     | 5                            |                                           |                                     | 5/5                                                                    | 2                       | 2                                                                                                                                                            |
| A4                                                                                                                                                            | 6                                   |                              |                                           |                                     | 6/6                                                                    | 1                       | 1                                                                                                                                                            |
| A5                                                                                                                                                            | 6                                   |                              |                                           |                                     | 6/6                                                                    | 1                       | 1                                                                                                                                                            |
| <b>Self-Help and voluntary care (S) (N=10)</b>                                                                                                                |                                     |                              |                                           |                                     |                                                                        |                         |                                                                                                                                                              |
| S1.1                                                                                                                                                          | 6                                   |                              |                                           |                                     | 6/6                                                                    | 1                       | 1                                                                                                                                                            |
| S1.2                                                                                                                                                          | 6                                   |                              |                                           |                                     | 6/6                                                                    | 1                       | 1                                                                                                                                                            |
| S1.3                                                                                                                                                          | 6                                   |                              |                                           |                                     | 6/6                                                                    | 1                       | 1                                                                                                                                                            |
| S1.4                                                                                                                                                          | 6                                   |                              |                                           |                                     | 6/6                                                                    | 1                       | 1                                                                                                                                                            |
| S1.5                                                                                                                                                          |                                     |                              |                                           | 6                                   | 6/6                                                                    | 4                       | 3                                                                                                                                                            |
| S2.1                                                                                                                                                          | 6                                   |                              |                                           |                                     | 6/6                                                                    | 1                       | 1                                                                                                                                                            |
| S2.2                                                                                                                                                          |                                     | 6                            |                                           |                                     | 6/6                                                                    | 2                       | 2                                                                                                                                                            |
| S2.3                                                                                                                                                          | 6                                   |                              |                                           |                                     | 6/6                                                                    | 1                       | 1                                                                                                                                                            |
| S2.4                                                                                                                                                          | 5                                   |                              |                                           |                                     | 5/5                                                                    | 1                       | 1                                                                                                                                                            |
| S2.5                                                                                                                                                          |                                     |                              |                                           | 6                                   | 6/6                                                                    | 4                       | 3                                                                                                                                                            |
| <b>Outpatient care (O) (N= 24)</b>                                                                                                                            |                                     |                              |                                           |                                     |                                                                        |                         |                                                                                                                                                              |
| O1.1                                                                                                                                                          | 2                                   | 3                            |                                           | 1                                   |                                                                        | 2                       | 2                                                                                                                                                            |
| O1.2                                                                                                                                                          | 2                                   | 2                            | 2                                         |                                     |                                                                        | 1                       | 1                                                                                                                                                            |
| O2.1                                                                                                                                                          |                                     | 6                            |                                           |                                     |                                                                        | 2                       | 2                                                                                                                                                            |
| O2.2                                                                                                                                                          | 1                                   | 4                            |                                           | 1                                   |                                                                        | 2                       | 2                                                                                                                                                            |
| O3.1                                                                                                                                                          | 1                                   | 1                            | 4                                         |                                     |                                                                        | 3                       | 3 (3/6)                                                                                                                                                      |
| O3.2                                                                                                                                                          | 1                                   | 1                            | 1                                         | 2                                   |                                                                        | 3                       | 3 (3/6)                                                                                                                                                      |
| O4.1                                                                                                                                                          |                                     | 6                            |                                           |                                     |                                                                        | 3                       | 2 (6/6)                                                                                                                                                      |
| O4.2                                                                                                                                                          | 1                                   | 1                            | 4                                         |                                     |                                                                        | 3                       | 2 (6/6)                                                                                                                                                      |
| O5.1.1                                                                                                                                                        |                                     | 5                            |                                           | 1                                   |                                                                        | 2                       | 2                                                                                                                                                            |
| O5.1.2                                                                                                                                                        | 1                                   | 4                            |                                           | 1                                   |                                                                        | 2                       | 2                                                                                                                                                            |
| O5.1.3                                                                                                                                                        |                                     | 2                            |                                           | 3                                   |                                                                        | 2                       | 2                                                                                                                                                            |
| O5.2.1                                                                                                                                                        |                                     | 5                            |                                           | 1                                   |                                                                        | 2                       | 2                                                                                                                                                            |
| O5.2.2                                                                                                                                                        | 1                                   | 4                            |                                           | 1                                   |                                                                        | 2                       | 2                                                                                                                                                            |
| O5.2.3                                                                                                                                                        |                                     | 2                            |                                           | 4                                   |                                                                        | 2                       | 2                                                                                                                                                            |
| O6.1                                                                                                                                                          |                                     | 6                            |                                           |                                     |                                                                        | 2                       | 2                                                                                                                                                            |
| O6.2                                                                                                                                                          | 1                                   | 4                            |                                           | 1                                   |                                                                        | 2                       | 2                                                                                                                                                            |
| O7.1                                                                                                                                                          | 1                                   | 4                            |                                           | 1                                   |                                                                        | 2                       | 2                                                                                                                                                            |
| O7.2                                                                                                                                                          | 1                                   | 3                            |                                           | 2                                   |                                                                        | 2                       | 2                                                                                                                                                            |
| O8.1                                                                                                                                                          | 1                                   | 4                            |                                           | 2                                   |                                                                        | 2                       | 2                                                                                                                                                            |
| O8.2                                                                                                                                                          |                                     | 2                            | 1                                         | 2                                   |                                                                        | 2                       | 2                                                                                                                                                            |
| O9.1                                                                                                                                                          | 3                                   | 4                            |                                           | 1                                   |                                                                        | 2                       | 2                                                                                                                                                            |
| O9.2                                                                                                                                                          | 2                                   | 3                            |                                           | 2                                   |                                                                        | 2                       | 2                                                                                                                                                            |
| O10.1                                                                                                                                                         | 4                                   | 1                            |                                           | 2                                   |                                                                        | 1                       | 1                                                                                                                                                            |
| O10.2                                                                                                                                                         | 1                                   | 2                            | 2                                         | 1                                   |                                                                        | 1                       | 1                                                                                                                                                            |
| <b>Day care (D) (22)</b>                                                                                                                                      |                                     |                              |                                           |                                     |                                                                        |                         |                                                                                                                                                              |
| D0.1                                                                                                                                                          |                                     | 2                            | 1                                         | 3                                   |                                                                        | 4                       | 3                                                                                                                                                            |
| D0.2                                                                                                                                                          |                                     |                              | 3                                         | 3                                   |                                                                        | 4                       | 3                                                                                                                                                            |
| D1.1                                                                                                                                                          |                                     | 2                            | 2                                         | 4                                   |                                                                        | 4                       | 3                                                                                                                                                            |
| D1.2                                                                                                                                                          |                                     | 2                            |                                           | 4                                   |                                                                        | 4                       | 3                                                                                                                                                            |
| D2.1                                                                                                                                                          |                                     | 2                            | 1                                         | 2                                   |                                                                        | 2                       | 2                                                                                                                                                            |
| D2.2                                                                                                                                                          |                                     | 2                            | 1                                         | 3                                   |                                                                        | 4                       | 3                                                                                                                                                            |
| D6.1                                                                                                                                                          |                                     | 4                            | 1                                         | 1                                   |                                                                        | 2                       | 2                                                                                                                                                            |
| D6.2                                                                                                                                                          |                                     | 3                            | 2                                         | 1                                   |                                                                        | 4                       | 3                                                                                                                                                            |
| D3.1                                                                                                                                                          |                                     | 3                            | 1                                         | 2                                   |                                                                        | 4                       | 3                                                                                                                                                            |
| D3.2                                                                                                                                                          | 1                                   | 3                            | 1                                         | 1                                   |                                                                        | 4                       | 3                                                                                                                                                            |
| D7.1                                                                                                                                                          |                                     | 3                            | 2                                         | 2                                   |                                                                        | 4                       | 3                                                                                                                                                            |
| D7.2                                                                                                                                                          |                                     | 2                            | 2                                         | 1                                   |                                                                        | 4                       | 3                                                                                                                                                            |
| D4.1                                                                                                                                                          |                                     | 5                            |                                           | 1                                   |                                                                        | 2                       | 2                                                                                                                                                            |
| D4.2                                                                                                                                                          |                                     | 1                            | 2                                         | 3                                   |                                                                        | 4                       | 3                                                                                                                                                            |
| D4.3                                                                                                                                                          | 1                                   | 3                            | 1                                         | 1                                   |                                                                        | 2                       | 2                                                                                                                                                            |
| D4.4                                                                                                                                                          | 3                                   | 2                            | 1                                         |                                     |                                                                        | 1                       | 1                                                                                                                                                            |
| D8.1                                                                                                                                                          |                                     | 4                            |                                           | 2                                   |                                                                        | 2                       | 2                                                                                                                                                            |
| D8.2                                                                                                                                                          |                                     | 1                            | 1                                         | 4                                   |                                                                        | 4                       | 3                                                                                                                                                            |
| D8.3                                                                                                                                                          | 4                                   |                              | 1                                         | 1                                   |                                                                        | 2                       | 2                                                                                                                                                            |
| D8.4                                                                                                                                                          | 4                                   |                              | 1                                         | 1                                   |                                                                        | 1                       | 1                                                                                                                                                            |
| D5                                                                                                                                                            |                                     | 5                            | 1                                         |                                     |                                                                        | 1                       | 1                                                                                                                                                            |
| D9                                                                                                                                                            |                                     | 4                            | 1                                         | 1                                   |                                                                        | 1                       | 1                                                                                                                                                            |
| <b>Residential services R (N=19) MTC types on additional figure 1.</b>                                                                                        |                                     |                              |                                           |                                     |                                                                        |                         |                                                                                                                                                              |
|                                                                                                                                                               |                                     |                              |                                           |                                     | 6/6                                                                    | 4                       | 3 (N=19)                                                                                                                                                     |
| <b>All residential services were classified to the category 4, after round 2, to the category 3., MTC codes on additional figure 1.m residential services</b> |                                     |                              |                                           |                                     |                                                                        |                         |                                                                                                                                                              |

Statistical test not done related to the individual classifications guiding role and small numbers of classifications. There were 14 MTC:s under half (<3/6) agreement.

Table 1. Specialists participating in to the Delphi-panel

| <i>Work position (At the time)</i>                  | <i>Academic credentials</i>                        |
|-----------------------------------------------------|----------------------------------------------------|
| Director of nursing (TA-N)                          | MNSc, PhD-student (chair of panel)                 |
| Research Professor (KW)                             | Associate professor, PhD, Specialist in Psychiatry |
| Psychiatrist (MS)                                   | Specialist in Psychiatry                           |
| Medicine director (GJ)                              | Associate professor, PhD, Specialist in Psychiatry |
| Chief Medical Officer (SS)                          | Associate professor, PhD, Specialist in Psychiatry |
| Development chief (PN)                              | Master of psychologists, PhD-student               |
| Project chief (RK)                                  | PhD                                                |
| Psychiatric nurse, Project coordinator (MV)         | MNSc                                               |
| Psychiatric nurse, Project coordinator (VM)         | RN                                                 |
| Administrative head nurse, Project coordinator (OO) | PhD                                                |
| Psychiatric nurse, Project coordinator (SG)         | RN                                                 |

Supplementary Table 3. Recoded Different main type of cares by main main branches and found frequency of units (BSICs) after first consensus classification round (Quadrangle classification)

|                                | <b>1 = local without gatekeeping</b> | <b>2 = local with gatekeeping</b> | <b>3 = centralized without gatekeeping</b> | <b>4 = centralized with gatekeeping</b> | <b>Total main type of care</b> |
|--------------------------------|--------------------------------------|-----------------------------------|--------------------------------------------|-----------------------------------------|--------------------------------|
| Main type of care (MTC N = 89) |                                      |                                   |                                            |                                         |                                |
| Information for care           | 7                                    | 2                                 |                                            |                                         | 9                              |
| Accessibility to care          | 3                                    | 2                                 |                                            |                                         | 5                              |
| Self-Help and voluntary care   | 7                                    | 1                                 |                                            | 2                                       | 10                             |
| Outpatient care                | 3                                    | 17                                | 4                                          |                                         | 24                             |
| Day care                       | 4                                    | 6                                 |                                            | 12                                      | 22                             |
| Residential care               |                                      |                                   |                                            | 19                                      | 19                             |
| Total (MTC N = 89)             | 24                                   | 28                                | 4                                          | 33                                      | 89                             |
| Percent of recoded MTC         | 27.0                                 | 31.5                              | 4.5                                        | 37.1                                    | 100                            |
| Frequency (BSIC N = 987)       | 360                                  | 189                               | 34                                         | 396                                     | 979                            |
| Percent of found BSICs         | 37 %                                 | 19 %                              | 3 %                                        | 40 %                                    | 100                            |

BSIC = Basic Stable Input of Care; i.e. the organizational units that provide the services. Missing 8 BSIC.

*Different MTC (main type of care) in ESMS-R (European Service Mapping Schedule-Revised) branches (N = 9)*

Supplementary Table 4. The classification of found service units (BSIC) on local versus centralized categories per 1000 adults (18+)

| Catchment Area    | Population (18 +) | Local without gatekeeping BSICs | Local without gatekeeping BSICs per 1000 | Local with gatekeeping BSICs | Local with gatekeeping BSICs per 1000 | Centralized BSICs | Centralized BSICs per 1000 | Total number of BSICs | Total number of BSICs per 1000 |
|-------------------|-------------------|---------------------------------|------------------------------------------|------------------------------|---------------------------------------|-------------------|----------------------------|-----------------------|--------------------------------|
| Länsi-Uusimaa (1) | 35 296            | 10.00                           | 0.28                                     | 3.00                         | 0.08                                  | 8.00              | 0.23                       | 21.00                 | 0.59                           |
| Lohja (2)         | 70 379            | 15.00                           | 0.21                                     | 9.00                         | 0.13                                  | 16.00             | 0.23                       | 40.00                 | 0.57                           |
| Hyvinkää (3)      | 139 734           | 37.00                           | 0.26                                     | 11.00                        | 0.08                                  | 41.00             | 0.29                       | 89.00                 | 0.64                           |
| Porvoo (4)        | 74 611            | 19.00                           | 0.25                                     | 3.00                         | 0.04                                  | 21.00             | 0.28                       | 43.00                 | 0.58                           |
| Helsinki (5)      | 501 928           | 49.00                           | 0.10                                     | 57.00                        | 0.11                                  | 90.00             | 0.18                       | 196.00                | 0.39                           |
| Jorvi (6)         | 230 005           | 25.00                           | 0.11                                     | 16.00                        | 0.07                                  | 31.00             | 0.13                       | 72.00                 | 0.31                           |
| Peijas (7)        | 187 332           | 30.00                           | 0.16                                     | 19.00                        | 0.10                                  | 36.00             | 0.19                       | 85.00                 | 0.45                           |
| Carea (8)         | 143 210           | 28.00                           | 0.20                                     | 37.00                        | 0.26                                  | 50.00             | 0.35                       | 115.00                | 0.80                           |
| Eksote (9)        | 107 612           | 28.00                           | 0.26                                     | 14.00                        | 0.13                                  | 26.00             | 0.24                       | 68.00                 | 0.63                           |
| Turku (10)        | 151 616           | 42.00                           | 0.28                                     | 16.00                        | 0.11                                  | 34.00             | 0.22                       | 92.00                 | 0.61                           |
| Salon seutu (11)  | 128 039           | 54.00                           | 0.42                                     | 19.00                        | 0.15                                  | 29.00             | 0.23                       | 102.00                | 0.80                           |
| Vakka-Suomi (12)  | 81 391            | 21.00                           | 0.26                                     | 9.00                         | 0.11                                  | 18.00             | 0.22                       | 48.00                 | 0.59                           |
| Turunmaa (13)     | 18 199            | 9.00                            | 0.49                                     | 0.00                         | 0.00                                  | 4.00              | 0.22                       | 13.00                 | 0.71                           |
| Total             | 1 869 352         | 367.00                          | 0.20                                     | 213.00                       | 0.11                                  | 404.00            | 0.22                       | 984.00                | 0.00                           |
| Mean              | 143 796           | 28.23                           | 0.25                                     | 16.38                        | 0.10                                  | 31.08             | 0.23                       | 75.92                 | 0.59                           |

Supplementary Table 5. Socioeconomic indicators from catchment areas

| Catchment area    | Population (+18 year)    | Mental health index (not age adjusted)* | Education index** | Un-employment % |
|-------------------|--------------------------|-----------------------------------------|-------------------|-----------------|
| Länsi-Uusimaa (1) | 35 296                   | 92.3                                    | 3.0               | 7.2             |
| Lohja (2)         | 70 379                   | 94.0                                    | 3.2               | 7.1             |
| Hyvinkää (3)      | 139 734                  | 92.9                                    | 3.5               | 6.0             |
| Porvoo (4)        | 74 611                   | 89.0                                    | 3.3               | 7.1             |
| Helsinki (5)      | 501 928                  | 90.0                                    | 4.1               | 7.5             |
| Jorvi (6)         | 230 005                  | 77.2                                    | 4.6               | 5.5             |
| Peijas (7)        | 187 332                  | 89.6                                    | 3.4               | 8.0             |
| Carea (8)         | 143 210                  | 106.2                                   | 3.0               | 12.2            |
| Eksote (9)        | 107 612                  | 102.7                                   | 3.0               | 11.8            |
| Turku (10)        | 151 616                  | 109.7                                   | 3.7               | 12.9            |
| Salo (11)         | 128 039                  | 101.0                                   | 3.2               | 8.8             |
| Vakka-Suomi (12)  | 81 391                   | 102.9                                   | 3.2               | 7.1             |
| Turunmaa (13)     | 18 199                   | 101.3                                   | 3.2               | 6.0             |
| Mean              | 143 796 (median 128 000) | 96.1                                    | 3.4               | 8.2             |
| SD                | 122 760                  | 8.9                                     | 0.5               | 2.5             |

Data Statistics Finland<sup>R</sup> THL (National Institute for Health and Welfare), SOTKANet Statistics and Indicator Bank.

Areas 1-9 data from 2011 and Areas 10-13 from 2012.

\* Mental health index (MHI) is calculated for each area using three years data on the suicides and suicides attempts, of persons eligible for special reimbursement for antipsychotic medication, and of persons on disability pension (18-64 years) due to mental disorders (<https://www.sotkanet.fi>)

\*\* Education years after primary school e.g. high school, professional school and university

Supplementary Table 6. Linear regression modeling with total personnel per 1000 adults as the dependent variable

| Independent variables                        | Model 1   | Model 2         | Model 3       | Model 4         |
|----------------------------------------------|-----------|-----------------|---------------|-----------------|
| % of total personnel in centralized services | 0.9 (2.9) | 1.1 (2.4)       | 1.6 (3.1)     | 2.3 (2.4)       |
| Catchment area size                          |           | 1.3 E-06 (.000) |               | 1.9 E-06 (.000) |
| Mental Health Index                          |           |                 | 0.18 (0.007)* | 0.02 (0.007)*   |

\* p < 0.05, \*\* p < 0.01

**Supplementary figure 1. ESMS- R (DESDE) mapping tree** (Salvador-Carulla et al. 2013, Salvador-Carulla et al. 2015) **including new coding variable.** Code 1 = local without gatekeeping MTC service, 2 = local with gatekeeping MTC service, 3 = centralized gatekeeping MTC service by referral or distance gatekeeping.

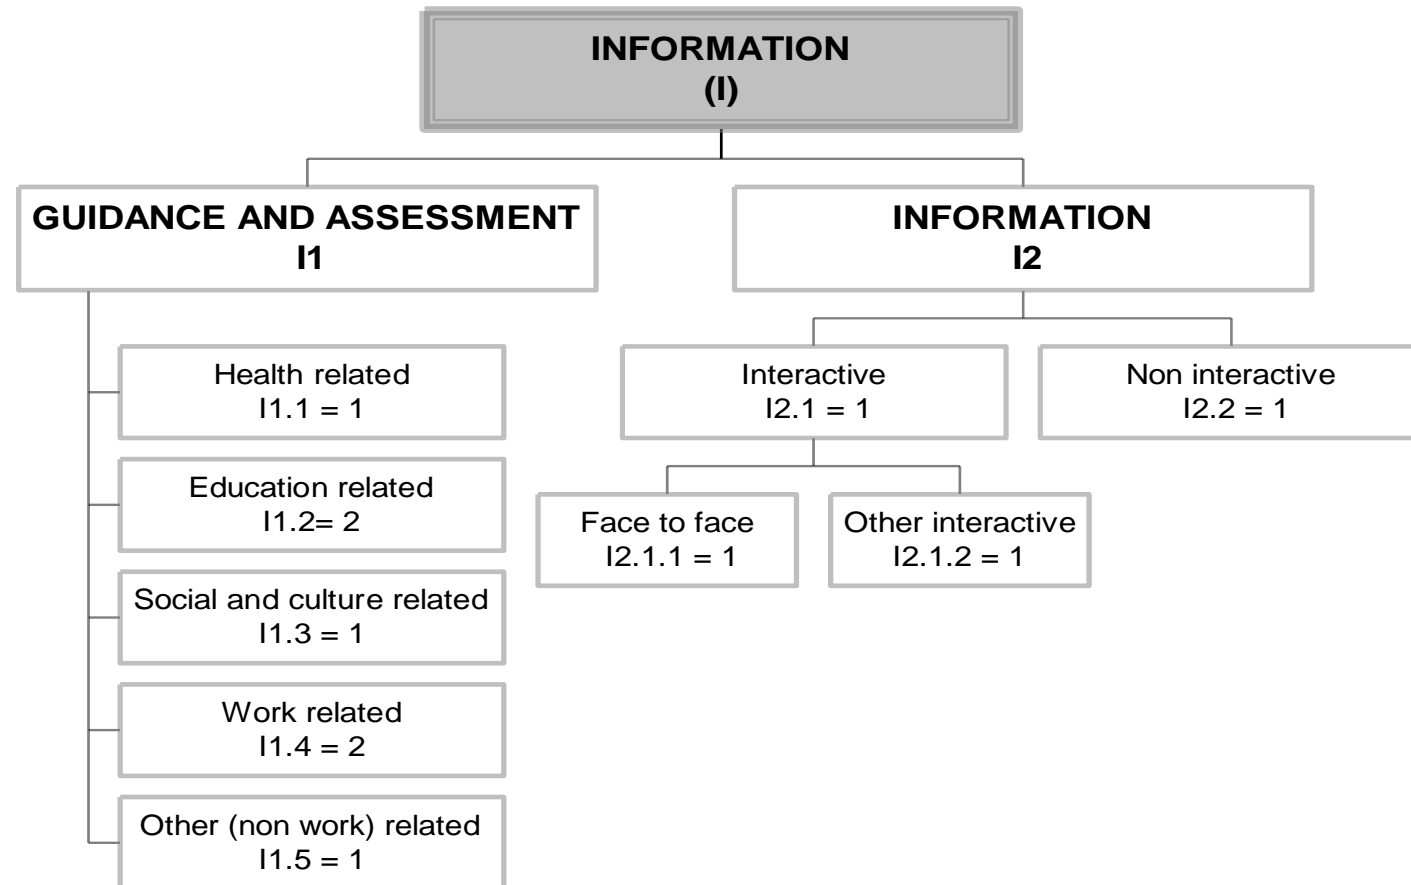

## ACCESSIBILITY TO CARE (A)

Communication  
**A1 = 1**

Physical mobility  
**A2 = 2**

Personal accompaniment  
**A3 = 2**

Case coordination  
**A4 = 1**

Other accessibility care  
**A5 = 1**

## SELF-HELP AND VOLUNTEER CARE

### NON PROFESSIONAL STAFF S1

S. Information on Care  
S1.1 = 1

S. Accesibility to Care  
S1.2 = 1

S. Outpatient Care  
S1.3 = 1

S. Day Care  
S.1.4 = 1

S. Residential Care  
S1.5 = 3

### PROFESSIONAL STAFF S2

S. Information on Care  
S2.1 = 1

S. Accesibility to Care  
S2.2 = 2

S. Outpatient Care  
S2.3 = 1

S. Day Care  
S2.4 = 1

S. Residential Care  
S2.5 = 3

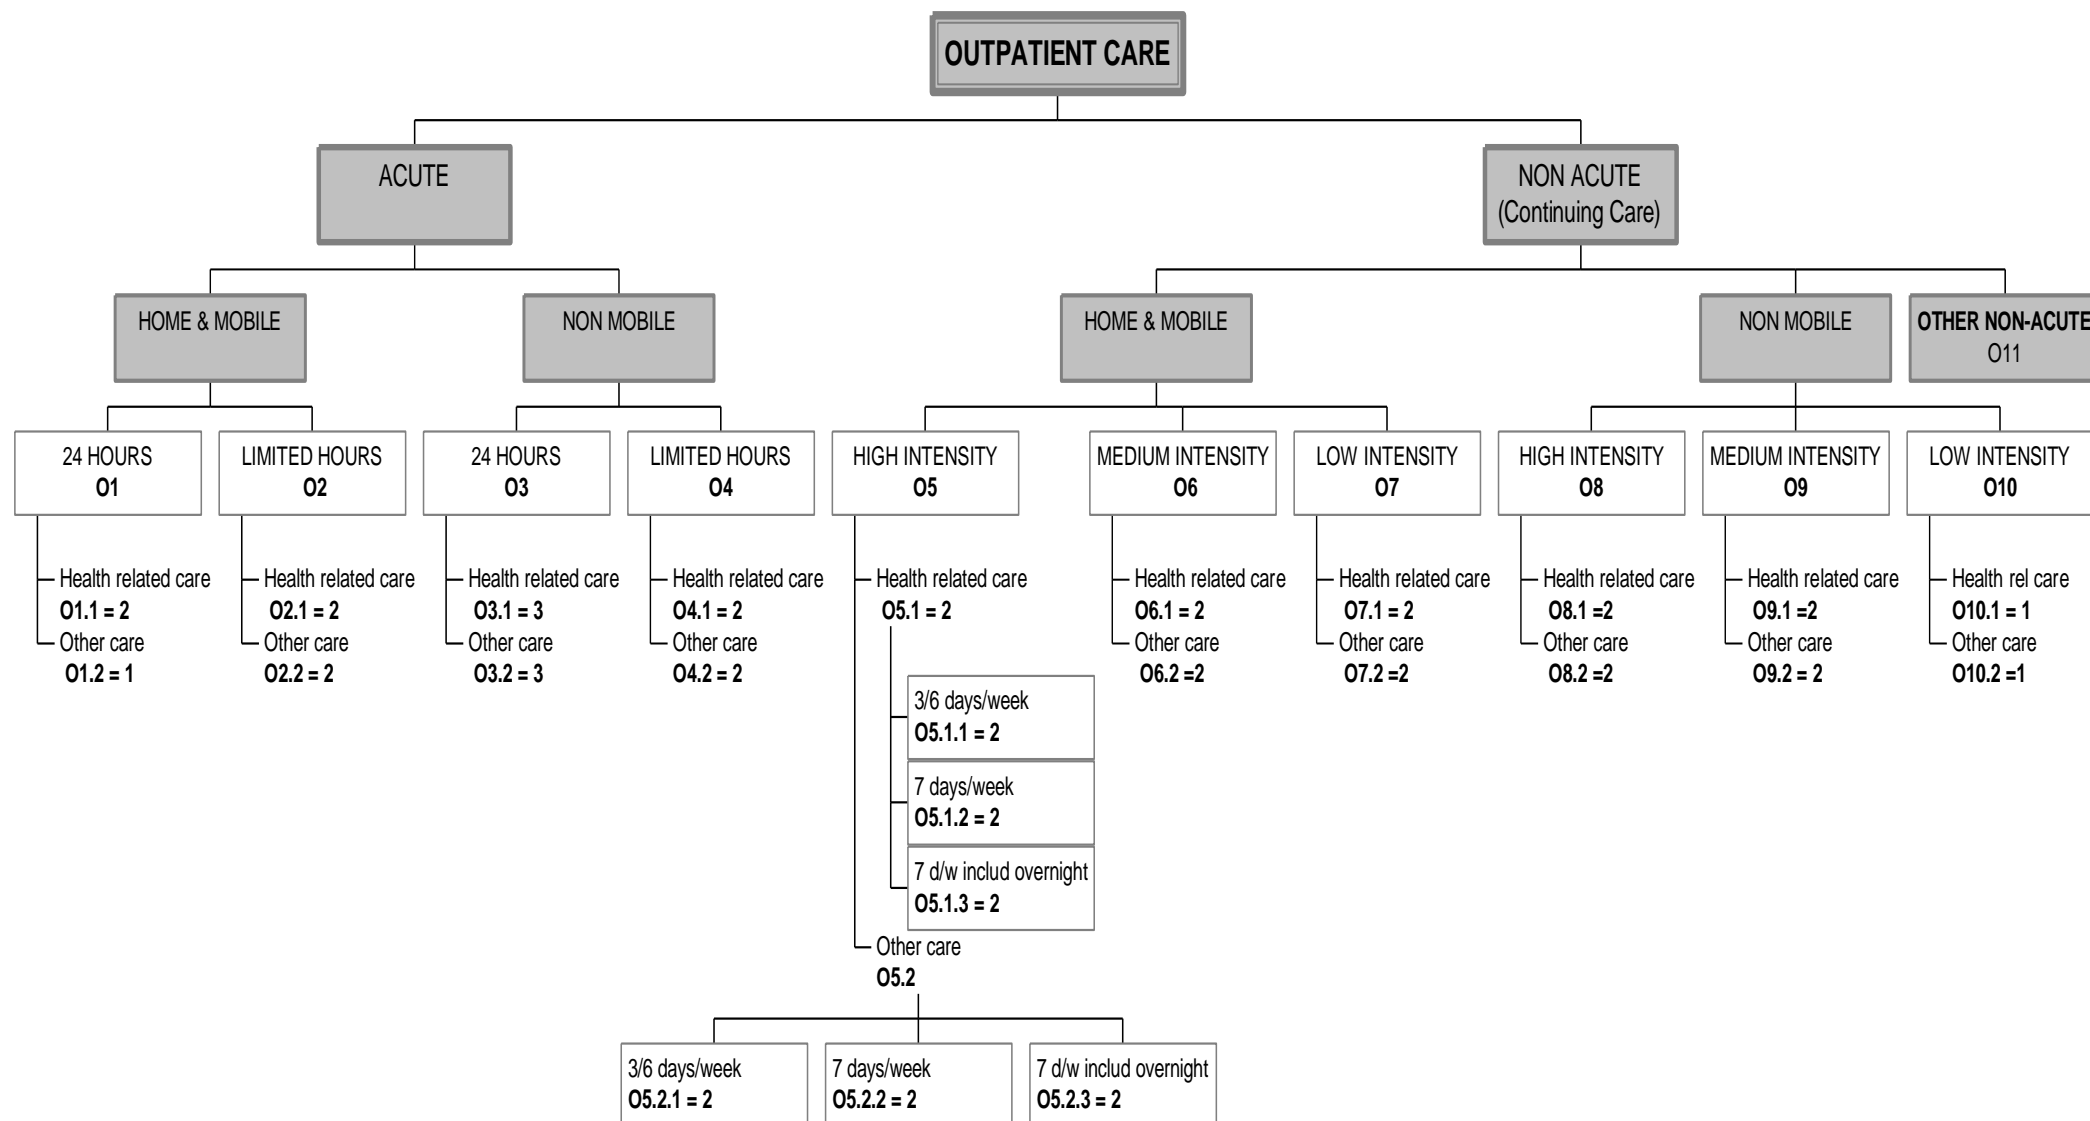

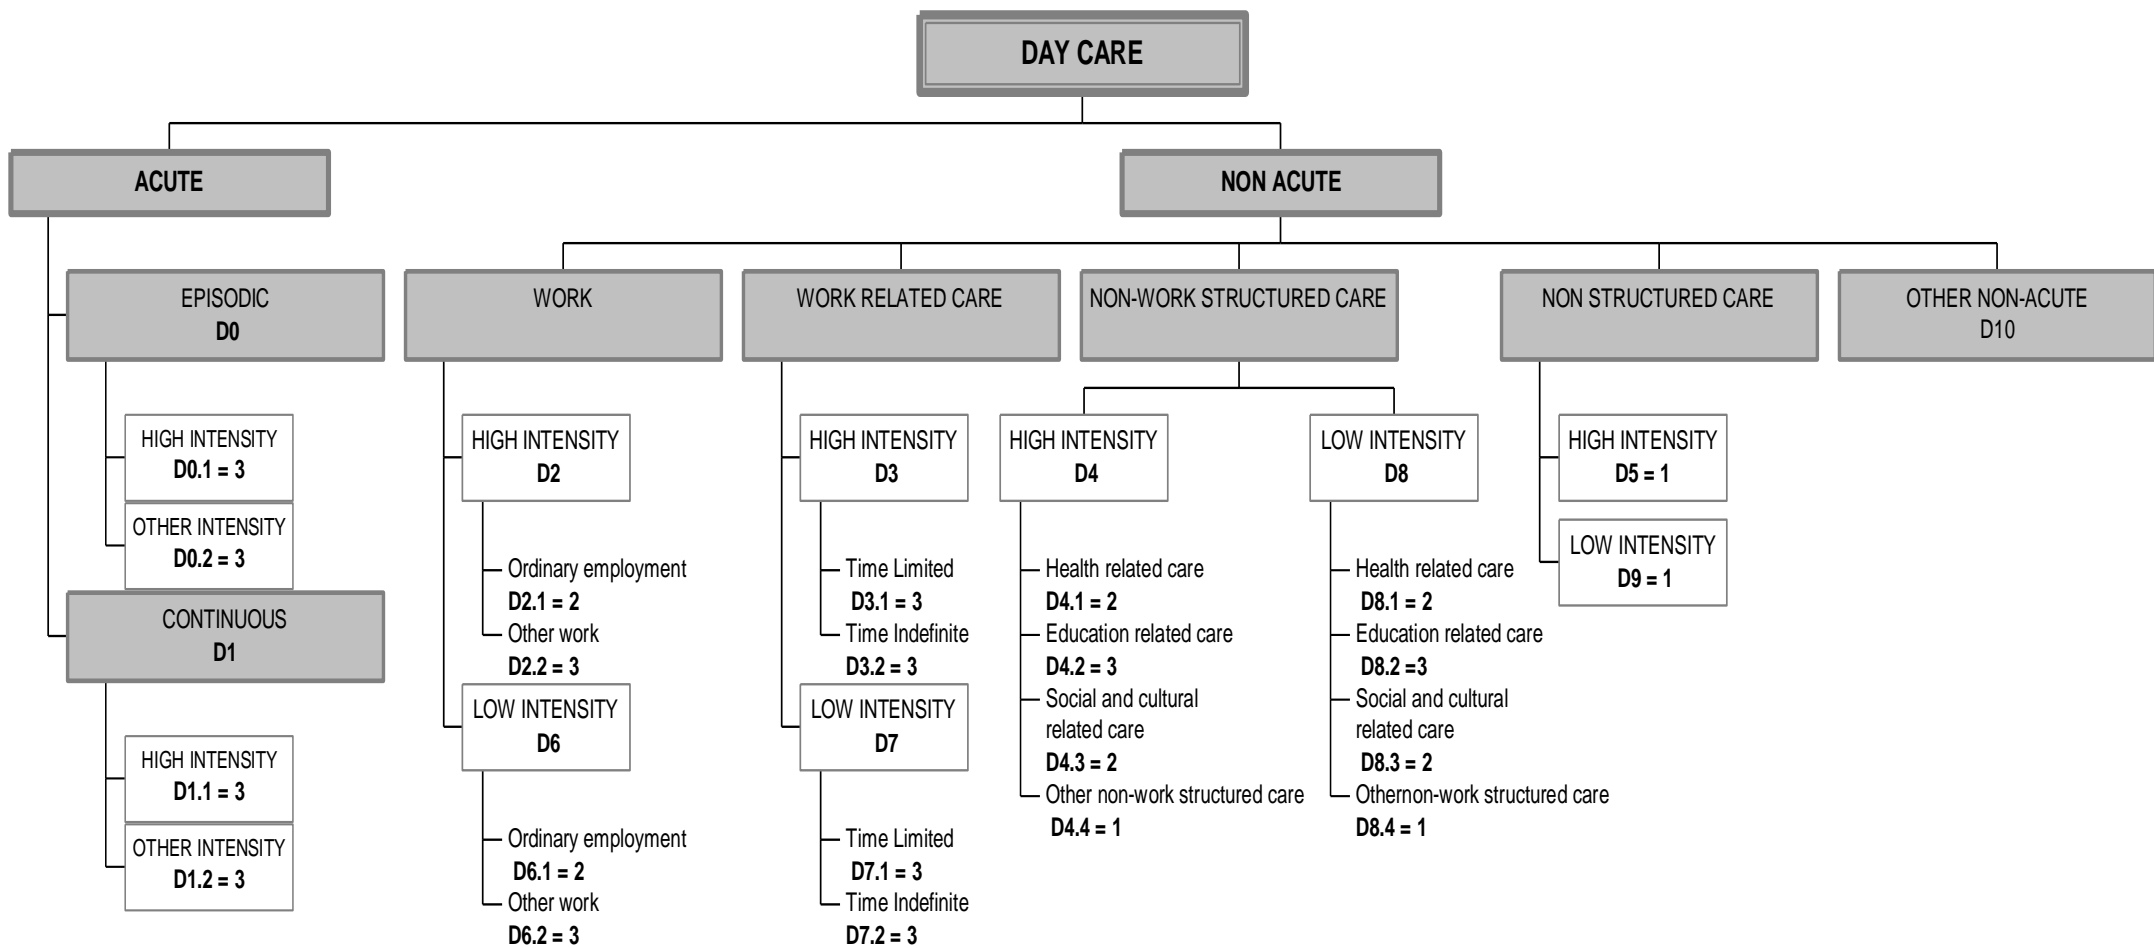

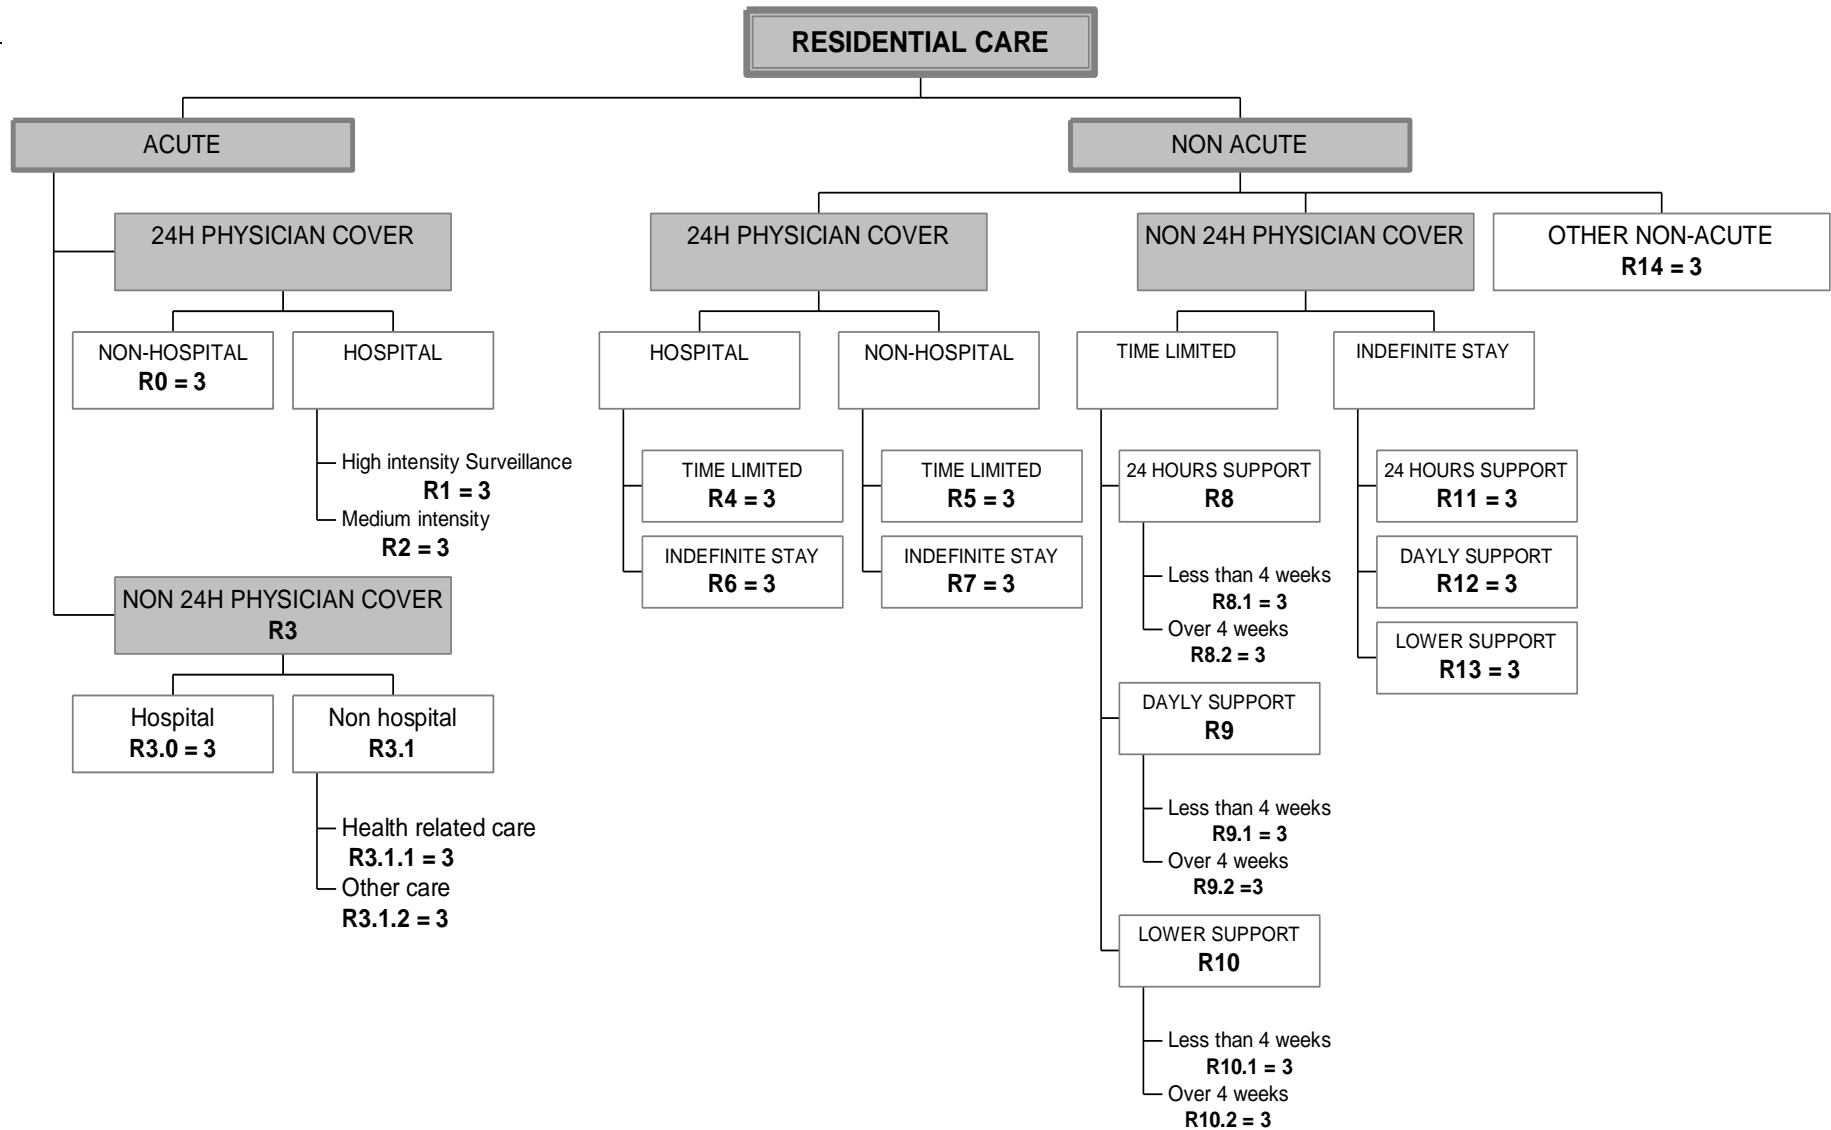

Supplement: Supplementary file 1 [file ijerph-15-01131-s001.pdf]
